# Supplementary material for: Differential Proteomic Analysis of Human Erythroblasts Undergoing Apoptosis Induced by Epo-Withdrawal
Source: PLoS One. 2012 Jun 18;7(6):e38356. doi: 10.1371/journal.pone.0038356 (PMC3377639; doi:10.1371/journal.pone.0038356)
Supplement: Table S1 — lists all peptides identified by mass spectrometry from each individual spot detailed in Table 1 . (DOCX) [file pone.0038356.s004.docx]

| **Supporting information Table S1. All peptides detected.** | | |
| --- | --- | --- |
|  | | |
| **Spot No.** | **Identified Proteins** | **Peptides detected** |
| 1 | SET isoform 2 | QPFFQKR |
| LRQPFFQK |
| SSQTQNKASR |
| VEVTEFEDIK |
| LNEQASEEILK |
| EFHLNESGDPSSK |
| LNEQASEEILKVEQK |
| IDFYFDENPYFENK |
| EQQEAIEHIDEVQNEIDR |
|  |  |  |
| 2 | 14-3-3 gamma | NLLSVAYK |
| YLAEVATGEK |
| DSTLIMQLLR |
| YLAEVATGEKR |
| EHMQPTHPIR |
| VDPEQLVQKAR |
| NVTELNEPLSNEER |
| ARLAEQAEGYDDMAAAMK |
| LAEQAEGYDDMAAAMKNVTELNEPLSNEER |
|  |  |  |
| 3 | 14-3-3 beta/alpha | LAEQAER |
| VISSIEQK |
| NLLSVAYK |
| MKGDYFR |
| EMQPTHPIR |
| YLSEVASGDNK |
| DSTLIMQLLR |
| KEMQPTHPIR |
| YLIPNATQPESK |
| AVTEQGHELSNEER |
| TAFDEAIAELDTLNEESYK |
| QTTVSNSQQAYQEAFEISK |
| QTTVSNSQQAYQEAFEISKK |
|  |  |  |
| 4 | heterogeneous nuclear ribonucleoproteins A2/B1 isoform A2 | KLFVGGIK |
| GGNFGFGDSR |
| DYFEEYGK |
| IDTIEIITDR |
| GGGGNFGPGPGSNFR |
| YHTINGHNAEVR |
| EESGKPGAHVTVKK |
| LTDCVVMRDPASK |
| YHTINGHNAEVRK |
| GFGFVTFDDHDPVDK |
| RGFGFVTFDDHDPVDK |
| LFVGGIKEDTEEHHLR |
| NMGGPYGGGNYGPGGSGGSGGYGGR |
| DYFEEYGKIDTIEIITDR |
| GFGFVTFDDHDPVDKIVLQK |
|  |  |  |
| 5 | heat shock protein HSP 90 alpha isoform 2 | DNSTMGYMAAK |
| ELHINLIPNK |
| ADLINNLGTIAK |
| RAPFDLFENR |
| EDQTEYLEER |
| TLTIVDTGIGMTK |
| ELISNSSDALDKIR |
| ELHINLIPNKQDR |
| HSQFIGYPITLFVEK |
| KHSQFIGYPITLFVEK |
| VILHLKEDQTEYLEER |
| HNDDEQYAWESSAGGSFTVR |
|  |  |  |
| 6 | 40S ribosomal protein SA | LLVVTDPR |
| SDGIYIINLK |
| FAAATGATPIAGR |
| SDGIYIINLKR |
| YVDIAIPCNNK |
| GAHSVGLMWWMLAR |
| FTPGTFTNQIQAAFR |
| DPEEIEKEEQAAAEK |
| AIVAIENPADVSVISSR |
| EHPWEVMPDLYFYR |
| FTPGTFTNQIQAAFREPR |
| AIVAIENPADVSVISSRNTGQR |
| FLAAGTHLGGTNLDFQMEQYIYK |
| FLAAGTHLGGTNLDFQMEQYIYKR |
| ADHQPLTEASYVNLPTIALCNTDSPLR |
|  |  |  |
| 7 | heat shock protein HSP 90-beta | ADHGEPIGR |
| ALLFIPRR |
| IDIIPNPQER |
| APFDLFENKK |
| ADLINNLGTIAK |
| ELISNASDALDK |
| DNSTMGYMMAK |
| EISDDEAEEEK |
| LGIHEDSTNRR |
| IRYESLTDPSK |
| EDQTEYLEER |
| TLTLVDTGIGMTK |
| YESLTDPSKLDSGK |
| ELISNASDALDKIR |
| ELKIDIIPNPQER |
| HSQFIGYPITLYLEK |
| KHSQFIGYPITLYLEK |
| VILHLKEDQTEYLEER |
| HNDDEQYAWESSAGGSFTVR |
|  |  |  |
| 8 | 14-3-3 epsilon | LAEQAER |
| NLLSVAYK |
| IISSIEQK |
| EAAENSLVAYK |
| DSTLIMQLLR |
| HLIPAANTGESK |
| YLAEFATGNDR |
| YLAEFATGNDRK |
| VAGMDVELTVEER |
| LICCDILDVLDK |
| AASDIAMTELPPTHPIR |
| AAFDDAIAELDTLSEESYK |
| LGLALNFSVFYYEILNSPDR |
|  |  |  |
| 9 | Myosin 9 | GDLPFVVPR |
| VAAYDKLEK |
| GDLPFVVPRR |
| RGDLPFVVPR |
| TEMEDLMSSK |
| DVLLQVDDER |
| ASREEILAQAK |
| GMFRTVGQLYK |
| LRLEVNLQAMK |
| ALSLARALEEAMEQK |
| NFINNPLAQADWAAKK |
| ANLQIDQINTDLNLER |
| LQQELDDLLVDLDHQR |
| TFHIFYYLLSGAGEHLK |
| SMEAEMIQLQEELAAAER |
| QAQQERDELADEIANSSGK |
| ELEDATETADAMNREVSSLK |
| IAQLEEELEEEQGNTELINDR |
| DFSALESQLQDTQELLQEENR |
|  |  |  |
| 10 | stathmin isoform a | ASGQAFELILSPR |
|  |  |  |
| 11 | eukaryotic initiation factor 4A- | ENYIHR |
| VFDMLNR |
| FMRDPIR |
| EELTLEGIR |
| VFDMLNRR |
| QFYINVER |
| VLITTDLLAR |
| ATQALVLAPTR |
| KEELTLEGIR |
| GYDVIAQAQSGTGK |
| KGVAINMVTEEDK |
| GFKDQIYDIFQK |
| MFVLDEADEMLSR |
| LQMEAPHIIVGTPGR |
| QFYINVEREEWK |
| GIYAYGFEKPSAIQQR |
| DFTVSAMHGDMDQKER |
| GIDVQQVSLVINYDLPTNR |
|  |  |  |
