# Supplementary material for: Differential Proteomic Analysis of Human Erythroblasts Undergoing Apoptosis Induced by Epo-Withdrawal
Source: PLoS One. 2012 Jun 18;7(6):e38356. doi: 10.1371/journal.pone.0038356 (PMC3377639; doi:10.1371/journal.pone.0038356)
Supplement: Table S7 — lists all peptides identified by mass spectrometry from each individual spot detailed in Table 7 . (DOCX) [file pone.0038356.s010.docx]

| **Supporting information Table S7. All peptides detected.** | | |
| --- | --- | --- |
| **Spot No.** | **Identified protein** | **Peptides detected** |
| 1 | Matrin-3 isoform a | GPGPLQER |
| ALWFQGR |
| DGSASAAAKK |
| EPPYRVPR |
| SFQQSSLSR |
| IKNYILMR |
| GPLPLSSQHR |
| VVHIMDFQR |
| TEEGPTLSYGR |
| FDSEYERMGR |
| GNLGAGNGNLQGPR |
| RTEEGPTLSYGR |
| DLDELSRYPEDK |
| EWSQHINGASHSR |
| ITPENLPQILLQLK |
| GPSLNPVLDYDHGSR |
| ITPENLPQILLQLKR |
| GAPPSSNIEDFHGLLPK |
| GDADQASNILASFGLSAR |
| RGAPPSSNIEDFHGLLPK |
| IGPYQPNVPVGIDYVIPK |
| CRDDSFFGETSHNYHK |
| VIHLSNLPHSGYSDSAVLK |
| DSFDDRGPSLNPVLDYDHGSR |
| DLSAAGIGLLAAATQSLSMPASLGR |
|  |  |  |
| 2 | Nucleolin | VFGNEIK |
| LELQGPR |
| ESFDGSVR |
| TGISDVFAK |
| GIAYIEFK |
| NDLAVVDVR |
| EALNSCNKR |
| SISLYYTGEK |
| EVFEDAAEIR |
| IVTDRETGSSK |
| ATFIKVPQNQNGK |
| GFGFVDFNSEEDAK |
| GYAFIEFASFEDAK |
| ALELTGLKVFGNEIK |
| FGYVDFESAEDLEK |
| VTLDWAKPKGEGGFGGR |
| KFGYVDFESAEDLEK |
| SKGYAFIEFASFEDAK |
| GLSEDTTEETLKESFDGSVR |
| VEGTEPTTAFNLFVGNLNFNK |
| TLVLSNLSYSATEETLQEVFEK |
|  |  |  |
| 3 | Splicing Factor 1 | ILRPWQSSETR |
| ATGANATPLDFPSK |
| SPSPEPIYNSEGK |
| MATGANATPLDFPSK |
| AYIVQLQIEDLTR |
| QGIETPEDQNDLRK |
| TVIPGMPTVIPPGLTR |
| TVIPGMPTVIPPGLTREQER |
| HNLITEMVALNPDFKPPADYKPPATR |
|  |  |  |
| 4 | Eukaryotic translation initiation factor 4E type 2 | WIIRLR |
| MPGRLGPQR |
| FQEDIISIWNK |
| VLNLPPNTIMEYK |
| QIGTFASVEQFWR |
| TPGRPTSSQSYEQNIK |
| RTPGRPTSSQSYEQNIK |
| AVVPGPAEHPLQYNYTFWYSR |
| FYSHMVRPGDLTGHSDF HLFK |
|  |  |  |
| 4 | Lysophospholipase-like 1 | CIVSPAGR |
| IIYPTAPPR |
| ASAVYQALQK |
| MAAASGSVLQR |
| GGISNVWFDR |
| QVLNQDLTFQHIK |
| FHSFPNVYHELSK |
| NHQDVAGVFALSSFLNK |
| HSASLIFLHGSGDSGQGLR |
